# Supplementary material for: Synthesis and Characterization of 3-(1-((3,4-Dihydroxyphenethyl)amino)ethylidene)-chroman-2,4-dione as a Potential Antitumor Agent
Source: PubMed Central journal article supplement (PMC6393868; doi:10.1155/2019/2069250), 2019-02-13
Supplement: 2069250.f1.pdf [file 2069250.f1.pdf]

**Supplementary information for**  
**Synthesis and characterization of**  
**3-(1-((3,4-dihydroxyphenethyl)amino)ethylidene)-chroman-2,4-dione as**  
**potential anti-tumor agent**

Dušan S. Dimić<sup>1</sup>, Zoran S. Marković<sup>2</sup>, Luciano Saso<sup>3</sup>, Edina H. Avdović<sup>4</sup>, Jelena R. Đorović<sup>5</sup>, Isidora P. Petrović<sup>6</sup>, Danijela D. Stanisavljević<sup>6</sup>, Milena J. Stevanović<sup>6-8</sup>, Ivan Potočnjak<sup>9</sup>, Erika Samořová<sup>9</sup>, Srećko R. Trifunović<sup>4</sup>, Jasmina M. Dimitrić Marković<sup>1\*</sup>

<sup>1</sup>*University of Belgrade, Faculty of Physical Chemistry, Studentski trg 12-16, 11000  
Belgrade, Serbia*

<sup>2</sup>*Department of Chemical-Technological Sciences, State University of Novi Pazar, Vuka  
Karadžića bb, 36300 Novi Pazar, Serbia*

<sup>3</sup>*Department of Physiology and Pharmacology "Vittorio Erspamer", Sapienza University of  
Rome, Rome, Italy*

<sup>4</sup>*University of Kragujevac, Faculty of Science, Radoja Domanovića 12, 34000 Kragujevac,  
Serbia*

<sup>5</sup>*BioIRC, Bioengineering R&D Center, Prvoslava Stojanovića 6, 34000 Kragujevac,  
Serbia*

<sup>6</sup>*University of Belgrade, Institute of Molecular Genetics and Genetic Engineering, Vojvode  
Stepe 444a, PO Box 23, 11010 Belgrade, Serbia*

<sup>7</sup>*University of Belgrade, Faculty of Biology, Studentski trg 16, 11000 Belgrade, Serbia*

<sup>8</sup>*Serbian Academy of Sciences and Art, Knez Mihajlova 35, 11000 Belgrade, Serbia*

<sup>9</sup>*Institute of Chemistry, P. J. Šafárik University in Košice, Moyzesova 11, 04154 Košice,  
Slovak Republic*

CCDC 1855089 contains the supplementary crystallographic data for **3**. These data can be obtained free of charge via <http://www.ccdc.cam.ac.uk/conts/retrieving.html>, or from the Cambridge Crystallographic Data Centre, 12 Union Road, Cambridge CB2 1EZ, UK; fax: (+44) 1223-336-033; or e-mail: deposit@ccdc.cam.ac.uk.

**Table S1.** Selected bond lengths [Å] and angles [°] for **3·MeOH**.

|         |            |             |            |
|---------|------------|-------------|------------|
| O3–C4   | 1.2483(15) | O3–C4–C3    | 123.95(12) |
| C4–C10  | 1.4730(18) | O3–C4–C10   | 118.68(11) |
| C4–C3   | 1.4420(18) | C3–C4–C10   | 117.37(11) |
| C3–C1'  | 1.4418(18) | C1'–C3–C4   | 120.27(11) |
| N1–C1'  | 1.3094(17) | N1–C1'–C3   | 117.93(11) |
| N1–C1'' | 1.4743(16) | C1'–N1–C1'' | 127.09(11) |
| C1'–C2' | 1.4988(18) | N1–C1'–C2'  | 118.88(11) |
| C3–C2   | 1.4389(17) | C1'–C3–C2   | 119.54(11) |
| O1–C2   | 1.3820(16) | C4–C3–C2    | 120.19(11) |
| O1–C9   | 1.3756(15) | C3–C1'–C2'  | 123.19(11) |
| O2–C2   | 1.2225(15) | O2–C2–C3    | 127.84(12) |
| C9–C10  | 1.3852(18) | O1–C2–C3    | 118.87(11) |
| O4–C5'' | 1.3762(15) | O2–C2–O1    | 113.29(11) |
| O5–C6'' | 1.3669(16) | C9–O1–C2    | 122.55(10) |
|         |            | O1–C9–C10   | 121.52(11) |
|         |            | C9–C10–C4   | 119.49(11) |

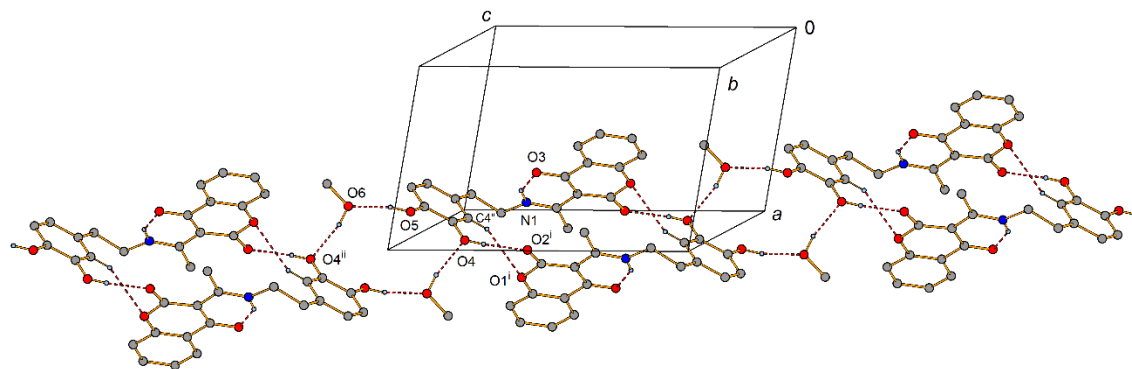

**Figure S2.** A chain parallel with the [011] direction in the crystal structure of **3·MeOH** showing hydrogen bonds (red dashed lines). Hydrogen atoms not involved in hydrogen bonds are omitted for clarity. Symmetry codes: (i):  $-x + 2, -y + 1, -z + 1$ ; (ii):  $-x + 2, -y + 2, -z + 2$ .

**Table S3.** Atomic coordinates ( $\times 10^4$ ) and equivalent isotropic displacement parameters ( $\text{\AA}^2 \times 10^3$ ) for **3•MeOH**.  $U(\text{eq})$  is defined as one third of the trace of the orthogonalized  $U^{\text{ij}}$  tensor.

| Atom | <i>x</i> | <i>y</i> | <i>z</i> | $U(\text{eq})$ |
|------|----------|----------|----------|----------------|
| O1   | 7543(1)  | 4443(1)  | 3584(1)  | 23(1)          |
| O4   | 9726(1)  | 8787(1)  | 7774(1)  | 22(1)          |
| O2   | 9530(1)  | 2212(1)  | 4134(1)  | 26(1)          |
| O3   | 6556(1)  | 6354(1)  | 6339(1)  | 27(1)          |
| O5   | 7865(1)  | 10199(1) | 9411(1)  | 27(1)          |
| O6   | 7455(1)  | 10809(1) | 11368(1) | 31(1)          |
| N1   | 8765(2)  | 3760(1)  | 7100(1)  | 21(1)          |
| C9   | 6321(2)  | 5958(2)  | 3693(1)  | 20(1)          |
| C4   | 6904(2)  | 5727(2)  | 5509(1)  | 20(1)          |
| C5"  | 8908(2)  | 7906(2)  | 8479(1)  | 19(1)          |
| C10  | 5955(2)  | 6637(2)  | 4620(1)  | 20(1)          |
| C4"  | 9064(2)  | 6330(2)  | 8364(1)  | 19(1)          |
| C6"  | 7930(2)  | 8657(2)  | 9340(1)  | 21(1)          |
| C2   | 8499(2)  | 3518(2)  | 4377(1)  | 20(1)          |
| C3   | 8200(2)  | 4157(2)  | 5358(1)  | 19(1)          |
| C1'  | 9178(2)  | 3201(2)  | 6195(1)  | 19(1)          |
| C2'  | 10642(2) | 1617(2)  | 6076(1)  | 23(1)          |
| C8"  | 7213(2)  | 6240(2)  | 9934(1)  | 24(1)          |
| C3"  | 8210(2)  | 5474(2)  | 9087(1)  | 20(1)          |
| C1"  | 9515(2)  | 2952(2)  | 8068(1)  | 23(1)          |
| C5   | 4698(2)  | 8187(2)  | 4678(1)  | 22(1)          |

|      |         |          |          |       |
|------|---------|----------|----------|-------|
| C2'' | 8338(2) | 3751(2)  | 8984(1)  | 23(1) |
| C6   | 3860(2) | 9018(2)  | 3822(1)  | 26(1) |
| C7   | 4250(2) | 8307(2)  | 2899(1)  | 27(1) |
| C8   | 5480(2) | 6773(2)  | 2829(1)  | 25(1) |
| C7'' | 7072(2) | 7808(2)  | 10064(1) | 25(1) |
| C11  | 6009(2) | 11858(2) | 11960(1) | 35(1) |

**Table S4.** The DFT Cartesian coordinates of the optimized structure of **3**

| Atom | <i>x</i> | <i>y</i> | <i>z</i> |
|------|----------|----------|----------|
| O1   | -3.578   | 0.782    | 1.338    |
| O4   | 5.574    | -0.544   | 1.563    |
| O2   | -2.345   | 2.491    | 1.961    |
| O3   | -0.962   | -0.336   | -1.607   |
| O5   | 4.164    | -2.793   | 1.691    |
| N1   | 0.512    | 1.637    | -1.021   |
| C9   | -3.831   | -0.316   | 0.574    |
| C4   | -1.738   | 0.042    | -0.700   |
| C5'' | 4.524    | -0.675   | 0.700    |
| C10  | -2.961   | -0.728   | -0.435   |
| C4'' | 4.170    | 0.301    | -0.224   |
| C6'' | 3.780    | -1.865   | 0.767    |
| C2   | -2.442   | 1.523    | 1.180    |
| C3   | -1.510   | 1.215    | 0.119    |
| C1'  | -0.355   | 2.029    | -0.090   |

|     |        |        |        |
|-----|--------|--------|--------|
| C2' | -0.088 | 3.284  | 0.688  |
| C8" | 2.363  | -1.058 | -1.028 |
| C3" | 3.089  | 0.128  | -1.098 |
| C1" | 1.785  | 2.284  | -1.373 |
| C5  | -3.820 | -1.872 | -1.182 |
| C2" | 2.695  | 1.241  | -2.040 |
| C6  | -4.441 | -2.580 | -0.920 |
| C7  | -5.302 | -2.149 | 0.098  |
| C8  | -5.004 | -1.020 | 0.848  |
| C7" | 2.709  | -2.041 | -0.101 |
| C11 |        |        |        |

---

**Table S5.** Results of docking analysis of the investigated coumarine with CDKs: model with its role in bond formation; corresponding amino acid with its position in the structure of protein, and with its role in bond formation; type of the interaction during bond formation; distance in Å between respective active sites of ligand and amino acids; pairwise interaction energy ( $E_i$ ) in kJ/mol; estimated free energy of binding ( $E_b$ ) in kJ/mol, estimated inhibition constant ( $K_i$ ) in  $\mu\text{M}$ .

| coumarine |                                        | Amino acid |                                  | Type of interaction          | Atom distance (Å) | $E_i$ (kJ/mol) | $E_b$ (kJ/mol) | $K_i$ ( $\mu\text{M}$ ) |
|-----------|----------------------------------------|------------|----------------------------------|------------------------------|-------------------|----------------|----------------|-------------------------|
| Model 2   |                                        |            |                                  |                              |                   |                | -17.87         | 746.49                  |
|           | H-Acceptor                             | LEU83      | H-Donor                          | Conventional Hydrogen Bond   | 1.83              | 2.93           |                |                         |
|           | $\pi$ -Orbitals are electron acceptors | LEU134     | C-H bond is electron donor       | Hydrophobic $\pi$ - $\sigma$ | 3.65              | -0.08          |                |                         |
|           | $\pi$ -Orbitals are electron acceptors | ALA144     | C-H bond is electron donor       | Hydrophobic $\pi$ - $\sigma$ | 3.89              | -0.08          |                |                         |
|           | $\pi$ -Orbitals are electron donors    |            | Alkyl group is electron acceptor | Hydrophobic $\pi$ -Alkyl     | 4.96              | -0.04          |                |                         |
|           | $\pi$ -Orbitals are electron donors    | VAL18      | Alkyl group is electron acceptor | Hydrophobic $\pi$ -Alkyl     | 4.84              | -0.08          |                |                         |
|           | $\pi$ -Orbitals are electron donors    | ALA31      | Alkyl group is electron acceptor | Hydrophobic $\pi$ -Alkyl     | 3.74              | -0.08          |                |                         |
|           | $\pi$ -Orbitals are electron donors    |            | Alkyl group is electron acceptor | Hydrophobic $\pi$ -Alkyl     | 4.60              | -0.04          |                |                         |
| Model 3   |                                        |            |                                  |                              |                   |                | -17.41         | 890.62                  |
|           | H-Donor                                | THR97      | H-Acceptor                       | Conventional Hydrogen Bond   | 2.55              | 1.80           |                |                         |
|           | $\pi$ -Orbitals are electron acceptors | LEU101     | H-Donor                          | $\pi$ -Donor Hydrogen Bond   | 2.49              | 3.05           |                |                         |
| Model 4   |                                        |            |                                  |                              |                   |                | -16.69         | $1.18 \times 10^3$      |
|           | H-Donor                                | GLU195     | H-Acceptor                       | Conventional Hydrogen Bond   | 2.43              | 3.26           |                |                         |
|           | H-Acceptor                             | LYS88      | H-Donor                          | Conventional Hydrogen Bond   | 3.36              | -0.13          |                |                         |
|           | H-Acceptor                             | ARG200     | H-Donor                          | Conventional Hydrogen Bond   | 3.28              | -0.08          |                |                         |
|           | $\pi$ -Orbitals are electron           | ASP92      | Negative                         | Electrostatic $\pi$ -        | 4.22              | -0.13          |                |                         |

|         |                                        |        |                                  |                              |      |       |        |                    |
|---------|----------------------------------------|--------|----------------------------------|------------------------------|------|-------|--------|--------------------|
|         | acceptors                              |        |                                  | Anion                        |      |       |        |                    |
|         | $\pi$ -Orbitals are electron donors    | ALA201 | Alkyl group is electron acceptor | Hydrophobic $\pi$ -Alkyl     | 4.47 | -0.08 |        |                    |
|         | $\pi$ -Orbitals are electron donors    | MET91  | Alkyl group is electron acceptor | Hydrophobic $\pi$ -Alkyl     | 4.72 | -0.08 |        |                    |
| Model 7 |                                        |        |                                  |                              |      |       | -16.07 | $1.54 \times 10^3$ |
|         | H-Acceptor                             | HIS268 | H-Donor                          | Conventional Hydrogen Bond   | 2.30 | 0.08  |        |                    |
|         | H-Acceptor                             |        | H-Donor                          | Carbon Hydrogen Bond         | 3.62 | -0.04 |        |                    |
|         | H-Acceptor                             | TYR269 | H-Donor                          | Conventional Hydrogen Bond   | 2.28 | 0.08  |        |                    |
|         | $\pi$ -Orbitals are electron acceptors | ARG245 | Positive                         | Electrostatic $\pi$ - Cation | 3.40 | -0.08 |        |                    |
|         | $\pi$ -Orbitals are electron acceptors |        | Positive                         | Electrostatic $\pi$ - Cation | 3.85 | -0.13 |        |                    |
|         | $\pi$ -Orbitals are electron acceptors | VAL226 | C-H bond is electron donor       | Hydrophobic $\pi$ - $\sigma$ | 3.62 | -0.04 |        |                    |
|         | $\pi$ -Orbitals are electron acceptors |        | C-H bond is electron donor       | Hydrophobic $\pi$ - $\sigma$ | 3.81 | -0.13 |        |                    |
| Model 9 |                                        |        |                                  |                              |      |       | -15.65 | $1.80 \times 10^3$ |
|         | H-Acceptor                             | ARG260 | H-Donor                          | Conventional Hydrogen Bond   | 2.33 | 0.08  |        |                    |
|         | H-Acceptor                             |        | H-Donor                          | Carbon Hydrogen Bond         | 3.51 | -0.13 |        |                    |
|         | H-Donor                                | GLU257 | H-Acceptor                       | Conventional Hydrogen Bond   | 1.95 | 1.51  |        |                    |
|         | $\pi$ -Orbitals are electron acceptors | PHE248 | H-Donor                          | $\pi$ -Donor Hydrogen Bond   | 2.66 | 1.00  |        |                    |



**Table S6.** Results of docking analysis of the investigated coumarine derivivate with CDKs: model with its role in bond formation; corresponding amino acid with its position in the structure of protein, and with its role in bond formation; type of interaction during bond formation; distance in Å between respective active cites of ligand and amino acids; pairwise interaction energy ( $E_i$ ) in kJ/mol; estimated free energy of binding ( $E_b$ ) in kJ/mol, estimated inhibition constant ( $K_i$ ) in  $\mu$ M.

| Compound<br>3 |                                           | Amino<br>acid |                                     | Type of interaction                                                | Atom<br>distance<br>(Å) | $E_i$<br>(kJ/mol) | $E_b$<br>(kJ/mol) | $K_i$<br>( $\mu$ M) |
|---------------|-------------------------------------------|---------------|-------------------------------------|--------------------------------------------------------------------|-------------------------|-------------------|-------------------|---------------------|
| Model 4       |                                           |               |                                     |                                                                    |                         |                   | -22.30            | 122.97              |
|               | H- Donor, Positive                        | ASP86         | H- Acceptor,<br>Negative            | Hydrogen<br>Bond;Electrostatic<br>Salt Bridge;Attractive<br>Charge | 2.37                    | 3.26              |                   |                     |
|               | H- Acceptor                               | LYS33         | H- Donor                            | Conventional<br>Hydrogen Bond                                      | 2.19                    | 0.17              |                   |                     |
|               | H- Acceptor                               | LYS129        | H- Donor                            | Conventional<br>Hydrogen Bond                                      | 2.59                    | 1.80              |                   |                     |
|               | H- Donor                                  | ASP145        | H- Acceptor                         | Conventional<br>Hydrogen Bond                                      | 1.98                    | 0.79              |                   |                     |
|               | H- Donor                                  |               | H- Acceptor                         | Conventional<br>Hydrogen Bond                                      | 1.84                    | 1.51              |                   |                     |
|               | $\pi$ -Orbitals are<br>electron acceptors | ILE10         | C-H bond is<br>electron donor       | Hydrophobic $\pi$ - $\sigma$                                       | 3.64                    | -0.13             |                   |                     |
| Model 9       |                                           |               |                                     |                                                                    |                         | 0.00              | -17.36            | 906.60              |
|               | H- Acceptor                               | LYS278        | H-Donor                             | Conventional<br>Hydrogen Bond                                      | 2.17                    | 0.38              |                   |                     |
|               | $\pi$ -Orbitals are<br>electron donors    |               | Alkyl group is<br>electron acceptor | Hydrophobic $\pi$ -Alkyl                                           | 3.75                    | -0.08             |                   |                     |
|               | H- Acceptor                               | HIS119        | H-Donor                             | Carbon Hydrogen<br>Bond                                            | 2.99                    | 0.63              |                   |                     |
| Model 3       |                                           |               |                                     |                                                                    |                         | 0.00              | -17.11            | $1.01 \times 10^3$  |
|               | H- Acceptor                               | VAL293        | H-Donor                             | Conventional<br>Hydrogen Bond                                      | 2.08                    | 0.79              |                   |                     |

|         |                                        |        |                                  |                              |      |       |        |                    |
|---------|----------------------------------------|--------|----------------------------------|------------------------------|------|-------|--------|--------------------|
|         | H-Donor                                | HIS295 | H- Acceptor                      | Conventional Hydrogen Bond   | 2.93 | 0.96  |        |                    |
|         | $\pi$ -Orbitals are electron acceptors | PRO292 | C-H bond is electron donor       | Hydrophobic $\pi$ - $\sigma$ | 3.98 | -0.08 |        |                    |
|         | $\pi$ -Orbitals are electron donors    |        | Alkyl group is electron acceptor | Hydrophobic $\pi$ -Alkyl     | 4.24 | -0.08 |        |                    |
| Model 6 |                                        |        |                                  |                              |      | 0.00  | -16.02 | $1.55 \times 10^3$ |
|         | H- Acceptor                            | HIS295 | H-Donor                          | Conventional Hydrogen Bond   | 2.20 | 0.17  |        |                    |
|         | $\pi$ -Orbitals are electron acceptors |        | C-H bond is electron donor       | Hydrophobic $\pi$ - $\sigma$ | 3.79 | -0.13 |        |                    |
|         | H-Donor                                | THR97  | H- Acceptor                      | Conventional Hydrogen Bond   | 2.15 | 0.38  |        |                    |
|         | H-Donor                                |        | H- Acceptor                      | Conventional Hydrogen Bond   | 2.39 | 3.26  |        |                    |
|         | H- Acceptor                            | PRO294 | H-Donor                          | Carbon Hydrogen Bond         | 3.48 | -0.13 |        |                    |
| Model 8 |                                        |        |                                  |                              |      | 0.00  | -14.77 | $2.57 \times 10^3$ |
|         | H- Acceptor                            | HIS296 | H-Donor                          | Conventional Hydrogen Bond   | 2.06 | 0.79  |        |                    |
|         | H-Donor                                | VAL293 | H- Acceptor                      | Conventional Hydrogen Bond   | 2.17 | 0.38  |        |                    |
|         | $\pi$ -Orbitals are electron acceptors | PRO292 | C-H bond is electron donor       | Hydrophobic $\pi$ - $\sigma$ | 3.66 | -0.13 |        |                    |
|         | $\pi$ -Orbitals are electron donors    |        | Alkyl group is electron acceptor | Hydrophobic $\pi$ -Alkyl     | 4.43 | -0.08 |        |                    |
| Model 2 |                                        |        |                                  |                              |      | 0.00  | -14.02 | $3.49 \times 10^3$ |
|         | H-Donor                                | HIS283 | H- Acceptor                      | Conventional Hydrogen Bond   | 2.58 | 1.80  |        |                    |
|         | H-Donor                                | ALA282 | H- Acceptor                      | Conventional Hydrogen Bond   | 2.12 | 0.38  |        |                    |
|         | $\pi$ -Orbitals are electron donors    | LEU281 | Alkyl group is electron acceptor | Hydrophobic $\pi$ -Alkyl     | 4.05 | -0.08 |        |                    |
